# Supplementary material for: Prognostic utility of tumor-infiltrating lymphocytes in residual tumor after neoadjuvant chemotherapy with trastuzumab for HER2-positive breast cancer
Source: PubMed Central journal article supplement (PMC6367461; doi:10.1038/s41598-018-38272-1), 2019-02-07
Supplement: 41598_2018_38272_MOESM1_ESM.pdf [file 41598_2018_38272_MOESM1_ESM.pdf]

**Supplementary Information**

**Prognostic utility of tumor-infiltrating lymphocytes in residual tumor after neoadjuvant chemotherapy with trastuzumab for HER2-positive breast cancer**

**Sasagu Kurozumi, Kenichi Inoue, Hiroshi Matsumoto, Takaaki Fujii, Jun Horiguchi, Tetsunari Oyama, Masafumi Kurosumi, and Ken Shirabe**

Table S1. Patients and tumor characteristics

| Age range (years)                    |     | Clinical tumor size   |    |
|--------------------------------------|-----|-----------------------|----|
| <40                                  | 20  | T1                    | 6  |
| 40 <sub>≤</sub> and <60              | 82  | T2                    | 80 |
| ≥60                                  | 26  | T3                    | 26 |
| Menopausal status                    |     | T4                    | 16 |
| Premenopausal                        | 51  | Clinical nodal status |    |
| Postmenopausal                       | 77  | N0                    | 41 |
| Type of breast surgery               |     | N1                    | 58 |
| Breast-conserving surgery            | 108 | N2                    | 17 |
| Mastectomy                           | 20  | N3                    | 12 |
| Axillary surgery                     |     | Clinical TNM stage    |    |
| Sentinel lymph node biopsy alone     | 53  | I                     | 2  |
| Axillary lymph node dissection       | 75  | IIA                   | 37 |
| ER status                            |     | IIB                   | 37 |
| ER-positive                          | 45  | IIIA                  | 29 |
| ER-negative                          | 83  | IIIB                  | 11 |
|                                      |     | IIIC                  | 12 |
| Abbreviations: ER, estrogen receptor |     |                       |    |

Table S2. Relationship between pathological complete response and clinicopathological factors

|                                                                                                       |                      | pCR      | Non-pCR  | pCR ratio (%) | <i>p</i> |
|-------------------------------------------------------------------------------------------------------|----------------------|----------|----------|---------------|----------|
|                                                                                                       |                      | <i>N</i> | <i>N</i> |               |          |
| ER                                                                                                    | Negative             | 65       | 18       | 78.3          | <0.0001  |
|                                                                                                       | Positive             | 18       | 27       | 40.0          |          |
| PgR                                                                                                   | Negative             | 69       | 23       | 75.0          | 0.00012  |
|                                                                                                       | Positive             | 14       | 22       | 38.9          |          |
| Ki-67 labeling index                                                                                  | High ( $\geq 30\%$ ) | 66       | 26       | 71.7          | 0.0090   |
|                                                                                                       | Low ( $< 30\%$ )     | 17       | 19       | 47.2          |          |
| Histological grade                                                                                    | Grade 3              | 76       | 33       | 69.7          | 0.0056   |
|                                                                                                       | Grade 1/2            | 7        | 12       | 36.8          |          |
| Clinical tumor size                                                                                   | T 3/4                | 27       | 19       | 58.7          | 0.28     |
|                                                                                                       | T 1/2                | 56       | 26       | 68.3          |          |
| Clinical nodal status                                                                                 | Positive             | 56       | 31       | 64.4          | 0.87     |
|                                                                                                       | Negative             | 27       | 14       | 65.9          |          |
| Abbreviations: ER, estrogen receptor; PgR, progesterone receptor; pCR, pathological complete response |                      |          |          |               |          |

Table S3. Correlations of tumor-infiltrating lymphocytes grades in the primary tumor and clinicopathological factors

|                                                                                                        |                      | Low<br>(TILs: 0%–10%) | Intermediate<br>(TILs: 10%–40%) | High<br>(TILs: 40%–90%) | <i>p</i> |
|--------------------------------------------------------------------------------------------------------|----------------------|-----------------------|---------------------------------|-------------------------|----------|
| ER                                                                                                     | Negative             | 31                    | 29                              | 19                      | 0.015    |
|                                                                                                        | Positive             | 35                    | 9                               | 5                       |          |
| PgR                                                                                                    | Negative             | 41                    | 32                              | 19                      | 0.037    |
|                                                                                                        | Positive             | 25                    | 6                               | 5                       |          |
| Ki-67 labeling index                                                                                   | High ( $\geq 30\%$ ) | 41                    | 30                              | 21                      | 0.031    |
|                                                                                                        | Low ( $< 30\%$ )     | 25                    | 8                               | 3                       |          |
| Histological grade                                                                                     | Grade 3              | 51                    | 36                              | 22                      | 0.033    |
|                                                                                                        | Grade 1/2            | 15                    | 2                               | 2                       |          |
| Clinical tumor size                                                                                    | T 3/4                | 21                    | 15                              | 10                      | 0.60     |
|                                                                                                        | T 1/2                | 45                    | 23                              | 14                      |          |
| Clinical nodal status                                                                                  | Positive             | 39                    | 28                              | 20                      | 0.062    |
|                                                                                                        | Negative             | 27                    | 10                              | 4                       |          |
| Abbreviations: TILs, tumor-infiltrating lymphocytes; ER, estrogen receptor; PgR, progesterone receptor |                      |                       |                                 |                         |          |
